# Supplementary material for: Determinants of polychlorinated biphenyls in dust from homes in California, USA
Source: Royal Society of Chemistry journal article supplement (doi:10.1039/c2em30721a), 2012-11-26
Supplement: c2em30721a.pdf [file c2em30721a.pdf]

**Table S1. Multivariable linear regression results for concentrations (ng/g) of specific PCBs in Northern California Childhood Leukaemia Study residences (2001-2006) with detectable levels of PCB.**

| Determinant                                               | Proportional increase (95% C.I.) |                     |                     |                     |
|-----------------------------------------------------------|----------------------------------|---------------------|---------------------|---------------------|
|                                                           | PCB-118,<br>N = 133              | PCB-138,<br>N = 221 | PCB-153,<br>N = 216 | PCB-180,<br>N = 161 |
| Residence built prior to 1980                             | 1.1 (0.7, 1.6)                   | 1.3 (1.0, 1.8)      | 1.4 (1.0, 1.9)      | 1.2 (0.8, 1.7)      |
| Replaced carpet within the past 5 years                   | 1.0 (0.7, 1.3)                   | 0.9 (0.7, 1.2)      | 1.0 (0.8, 1.3)      | 1.1 (0.8, 1.5)      |
| Replaced flooring in home                                 | 1.0 (0.6, 1.5)                   | 1.0 (0.7, 1.5)      | 1.1 (0.7, 1.5)      | 0.9 (0.6, 1.3)      |
| Replaced roof in home                                     | 1.1 (0.7, 2.0)                   | 0.8 (0.5, 1.3)      | 0.7 (0.5, 1.2)      | 0.8 (0.5, 1.4)      |
| Remodeled sampled room                                    | 0.8 (0.6, 1.2)                   | 1.0 (0.8, 1.3)      | 1.0 (0.8, 1.4)      | 1.3 (1.0, 1.8)      |
| Regularly vacuum at least once a week                     | 1.5 (1.1, 2.1)*                  | 1.1 (0.8, 1.5)      | 0.9 (0.7, 1.2)      | 0.8 (0.6, 1.1)      |
| Population density <sup>a</sup> , persons/km <sup>2</sup> | 1.1 (1.0, 1.3)*                  | 1.0 (0.9, 1.0)      | 1.0 (1.0, 1.1)      | 1.0 (0.9, 1.1)      |
| Resident employed as electrician <sup>b</sup>             | 1.5 (0.6, 3.9)                   | 1.7 (0.7, 4.0)      | 1.4 (0.6, 3.1)      | 1.5 (0.6, 3.5)      |
| Resident employed in industrial operation <sup>c</sup>    | 1.4 (0.7, 2.8)                   | 0.9 (0.5, 1.3)      | 0.9 (0.5, 1.6)      | 0.8 (0.5, 1.6)      |
| Residents do not remove their shoes                       | 1.1 (0.8, 1.6)                   | 1.2 (0.9, 1.6)      | 1.1 (0.8, 1.5)      | 0.8 (0.6, 1.1)      |
| Resident has cat or dog in home                           | 0.9 (0.6, 1.3)                   | 0.8 (0.6, 1.1)      | 0.9 (0.6, 1.2)      | 1.0 (0.8, 1.4)      |

\* Indicates linear regression coefficient *p*-value < 0.05  
Model *r*<sup>2</sup> was 0.11, 0.05, 0.04, and 0.06 for PCBs 118, 138, 153, and 180, respectively  
<sup>a</sup> Proportional increase per each increase in population density of 2000 persons/km<sup>2</sup>  
<sup>b</sup> Includes any resident employed as an electrician, lineman, or cable puller.  
<sup>c</sup> Includes any resident employed in manufacturing, assembly, or industrial operation

**Table S2. Percentage of residences in the Northern California Childhood Leukaemia Study (2001-2006) with detectable concentrations of PCB, by potential PCB determinants.**

| Determinants                                                        | N <sup>a</sup> | Residences with PCB detected, % |         |         |         |         |         |
|---------------------------------------------------------------------|----------------|---------------------------------|---------|---------|---------|---------|---------|
|                                                                     |                | PCB-105                         | PCB-118 | PCB-138 | PCB-153 | PCB-170 | PCB-180 |
| Replaced carpet within the past 5 years                             | 233            | 10                              | 31      | 52      | 49      | 9.4     | 35      |
| Carpet older than 5 years                                           | 175            | 16                              | 34      | 57      | 58      | 9.1     | 45      |
| Replaced flooring in home                                           | 67             | 10                              | 40      | 66*     | 66*     | 9.0     | 48      |
| Did not replace flooring                                            | 347            | 13                              | 31      | 51*     | 50*     | 9.2     | 37      |
| Replaced roof in home                                               | 38             | 7.9                             | 39      | 61      | 58      | 7.9     | 45      |
| Did not replace roof                                                | 376            | 13                              | 31      | 53      | 52      | 9.3     | 38      |
| Remodeled room from which dust was sampled prior to dust collection | 147            | 12                              | 33      | 54      | 54      | 11      | 38      |
| No remodeling in sampled room                                       | 260            | 12                              | 32      | 53      | 51      | 8.1     | 39      |
| Regularly vacuum at least once a week                               | 316            | 12                              | 30*     | 52      | 49*     | 8.9     | 37      |
| Vacuum less than once a week                                        | 89             | 15                              | 43*     | 58      | 66*     | 10      | 46      |
| Population density ≥2000 persons/km <sup>2</sup>                    | 186            | 13                              | 34      | 59      | 54      | 11      | 44      |
| Population density <2000 persons/km <sup>2</sup>                    | 223            | 12                              | 31      | 50      | 50      | 7.6     | 35      |
| Resident employed as electrician <sup>b</sup>                       | 12             | 25                              | 33      | 42      | 50      | 17      | 42      |
| No electricians in the home                                         | 402            | 12                              | 32      | 54      | 52      | 9.0     | 39      |
| Resident employed in industrial operation <sup>c</sup>              | 25             | 12                              | 32      | 76*     | 56      | 16      | 40      |
| No industrial employees in the home                                 | 389            | 12                              | 32      | 52*     | 52      | 8.7     | 39      |
| Residents do not remove their shoes                                 | 276            | 13                              | 34      | 53      | 52      | 9.1     | 41      |
| Residents typically remove their shoes                              | 136            | 10                              | 26      | 54      | 52      | 9.6     | 34      |
| Resident has cat or dog in home                                     | 155            | 7.7*                            | 30      | 49      | 48      | 8.4     | 39      |
| No pets in the home                                                 | 259            | 15*                             | 33      | 57      | 55      | 9.7     | 39      |

\* Indicates that the proportion of residences with PCB detected in the two comparison groups are significantly different using the two-proportion z-test ( $p$ -value < 0.05)

<sup>a</sup> Includes 415 residences; missing data is due to incomplete questionnaire responses.

<sup>b</sup> Includes any resident employed as an electrician, lineman, or cable puller.

<sup>c</sup> Includes any resident employed in manufacturing, assembly, or industrial operations
